# Supplementary material
Source: publisher figshare collection journal article supplement (https://sage.figshare.com/ndownloader/files/19255832)
Supplement: Supplementary file 1 [file 19255832]

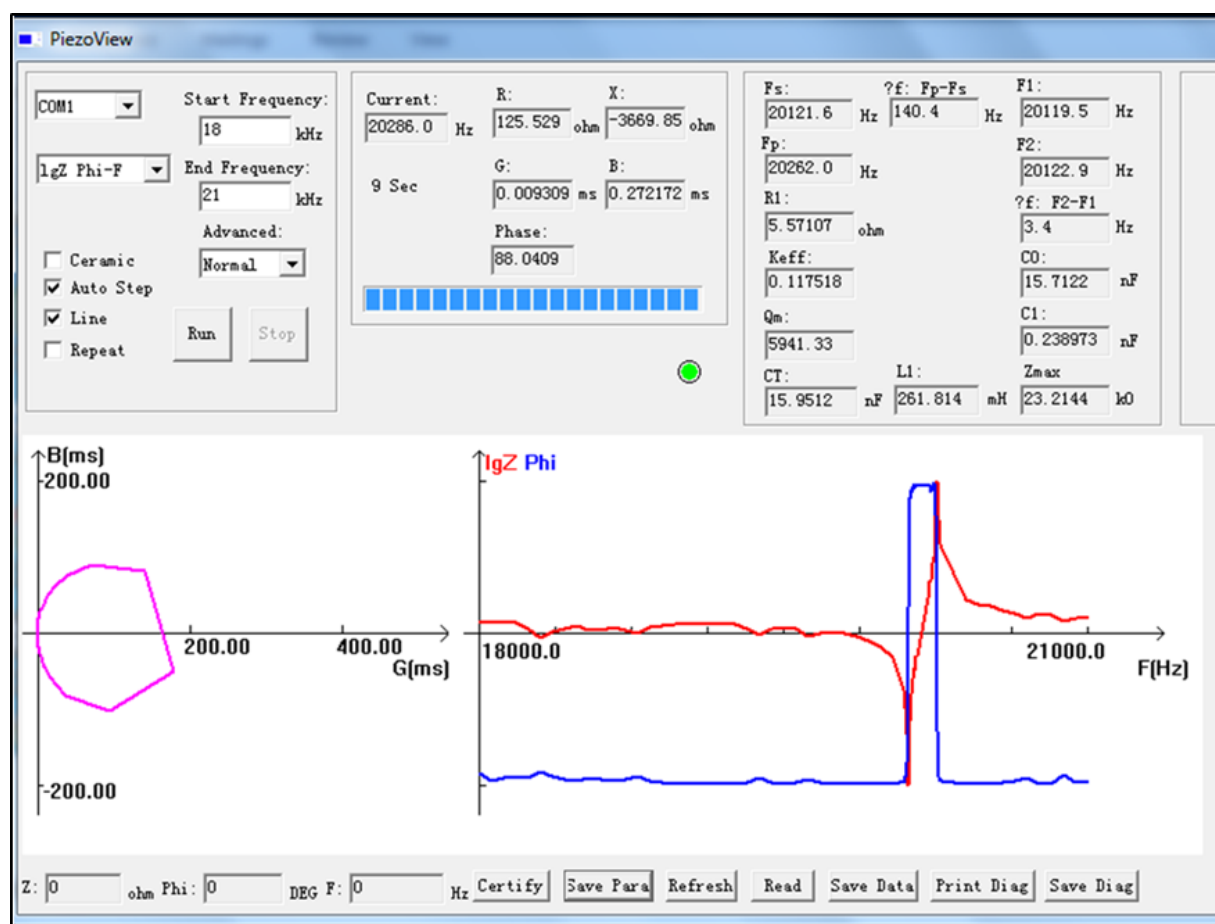

**Figure S1:** Measurement of vibrational frequency using a PiezoView software, of the designed tool assembly
